# Supplementary material for: Relaxed Substrate Specificity Leads to Extensive tRNA Mischarging by Streptococcus pneumoniae Class I and Class II Aminoacyl-tRNA Synthetases
Source: PubMed Central journal article supplement — mBio. 2014 Sep 9;5(5):e01656-14. doi: 10.1128/mBio.01656-14 (PMC4173786; doi:10.1128/mbio.01656-14), 2014-09-09
Supplement: mbo005141981sf1.pdf [file mbo005141981sf1.pdf]

## Supplementary Figure 1

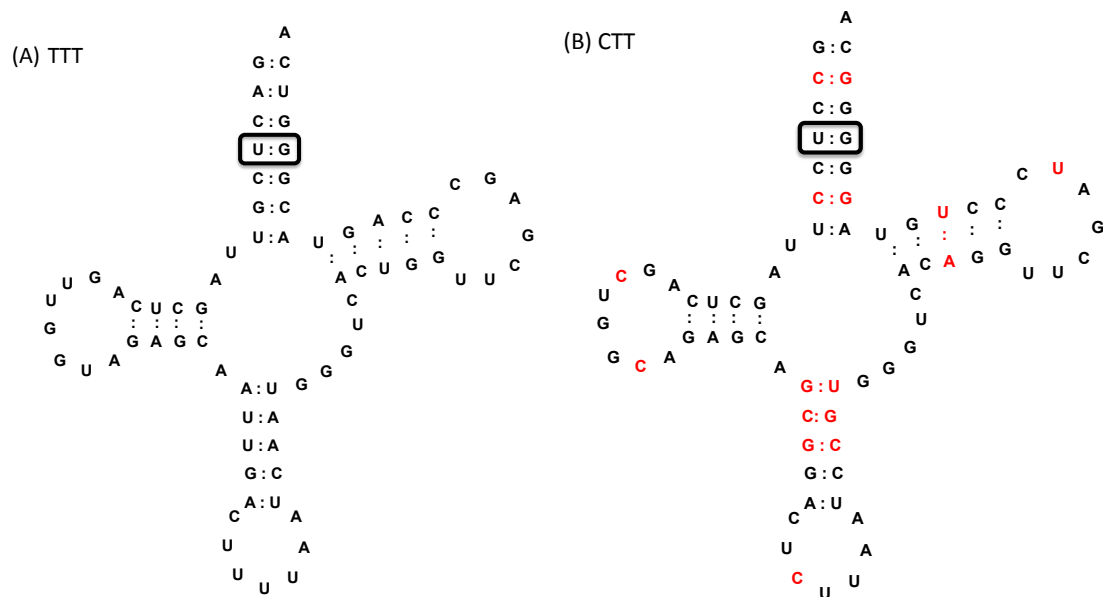

**Predicted cloverleaf structures of *S. pneumoniae* tRNA<sup>Lys</sup> anticodon TTT (A) and CTT (B).** Sequences variations between the two tRNA<sup>Lys</sup> isoacceptors are highlighted in red. All tRNA cloverleaf structures are shown without the CCA end.
