# Supplementary material for: Relaxed Substrate Specificity Leads to Extensive tRNA Mischarging by Streptococcus pneumoniae Class I and Class II Aminoacyl-tRNA Synthetases
Source: PubMed Central journal article supplement — mBio. 2014 Sep 9;5(5):e01656-14. doi: 10.1128/mBio.01656-14 (PMC4173786; doi:10.1128/mbio.01656-14), 2014-09-09
Supplement: mbo005141981sf2.pdf [file mbo005141981sf2.pdf]

## Supplementary figure 2

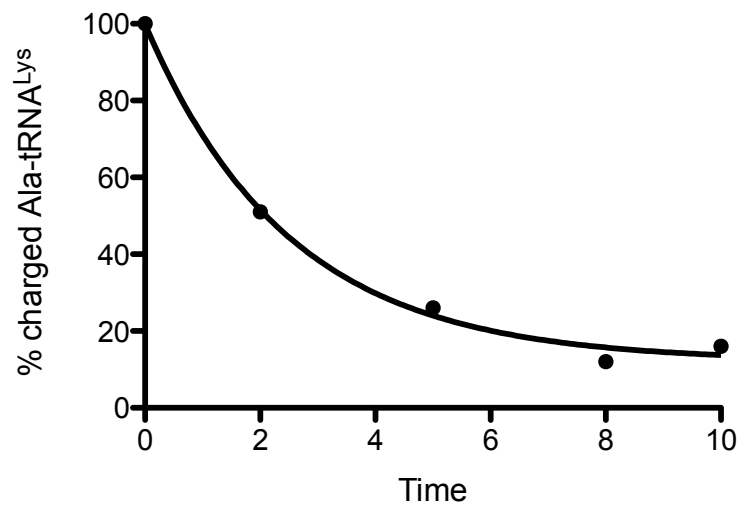

**Natural deacylation of mischarged pneumococcal Ala-tRNA<sup>Lys</sup> demonstrates its inherent instability.** Deacylation time courses were carried out as described by incubation of 10 pM [<sup>14</sup>C] Ala-tRNA<sup>Lys</sup> in buffer composed of 0.1 M Na-HEPES, pH 7.2, 30 mM KCl, and 10 mM MgCl<sub>2</sub>.
